# Supplementary material for: Effect of 1D twisted water chains confined in channels formed by a Gemini amphiphile on its crystal stability
Source: Royal Society of Chemistry journal article supplement (doi:10.1039/c4ce01879f), 2014-12-17
Supplement: c4ce01879f1.pdf [file c4ce01879f1.pdf]

Supporting Information for

**Effect of 1D Twisted Water Chains Confined in Channels Formed  
by a Gemini Amphiphile on its Crystal Stability**

*Yujie Sheng<sup>‡</sup>, Junyao Yao<sup>‡</sup>, Qibin Chen<sup>\*</sup>, Honglai Liu*

Key Laboratory for Advanced Materials and Department of Chemistry, East China University of  
Science and Technology, Shanghai, 200237, China

\*Corresponding authors: [qibinchen@ecust.edu.cn](mailto:qibinchen@ecust.edu.cn) (Q. Chen)

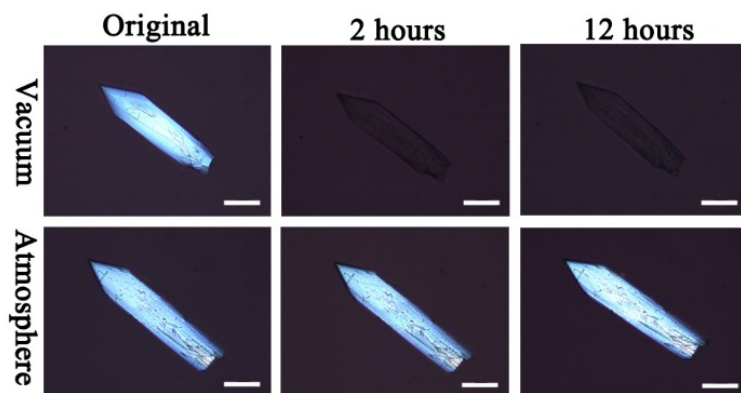

**Figure S1.** Crystal transition at 65°C in vacuum and atmospheric environment. Scale bar in all images is 100  $\mu\text{m}$ .

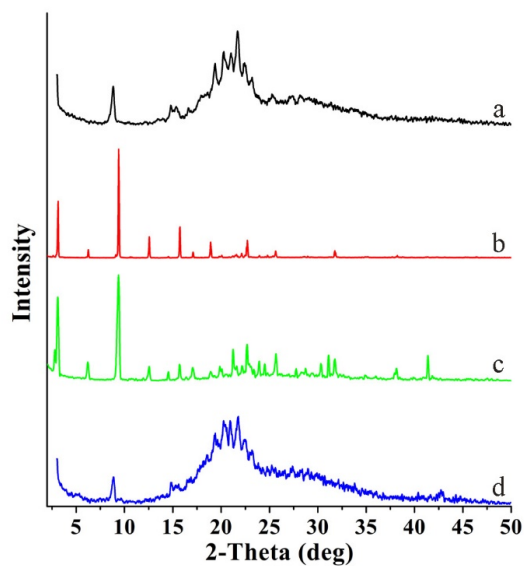

**Figure S2.** Powder X-ray diffraction profiles of the crystal: a. raw material; b. 12-2Ar crystal; c. water-held crystal; d. water-removed “crystal”.
